# Supplementary material
Source: PubMed Central journal article supplement (PMC6817420)
Supplement: NIHMS1537877-supplement-coa_form_complete.pdf [file NIHMS1537877-supplement-coa_form_complete.pdf]

# Change of Authorship Form

(Must be completed and signed by ALL authors)

Please check all that apply

New author(s) have been added (in addition to this form, all new authors must complete the copyright transfer agreement and conflict of interest disclosure.

Change in order of authorship.

An author wishes to remove his/her name. An author's name may only be removed his/her own request and a letter signed by the author should accompany this form

STROKE/2019/026362R1

Manuscript Number \_\_\_\_\_

Manuscript Title High-Resolution Magnetic Resonance Imaging of Cervicocranial Artery Dissection: Imaging Features Associated with Stroke

## Former Authorship

Please list ALL AUTHORS in the same order as the original submission. For more than 12, use an extra sheet.

### Print Name

- Name (1) Ye Wu
- Name (2) Fang Wu
- Name (3) Yuehong Liu
- Name (4) Zhaoyang Fan
- Name (5) Marc Fisher
- Name (6) Debiao Li

### Print Name

- Name (7) Weihai Xu
- Name (8) Tao Jiang
- Name (9) Jingliang Cheng
- Name (10) Bin Sun
- Name (11) Xunmin Ji
- Name (12) Qi Yang

## New Authorship

All authors must sign below agreeing to the changes in authorship. The authorship order must reflect the authorship order of the manuscript.

|                                 |                                  |                           |
|---------------------------------|----------------------------------|---------------------------|
| Name (1) <u>Ye Wu</u>           | Signature <u>Ye Wu</u>           | Date <u>July 18, 2019</u> |
| Name (2) <u>Fang Wu</u>         | Signature <u>Fang Wu</u>         | Date <u>Jul 18, 2019</u>  |
| Name (3) <u>Yuehong Liu</u>     | Signature <u>Yuehong Liu</u>     | Date <u>Jul 18, 2019</u>  |
| Name (4) <u>Zhaoyang Fan</u>    | Signature <u>Zhaoyang Fan</u>    | Date <u>Jul. 18, 2019</u> |
| Name (5) <u>Marc Fisher</u>     | Signature <u>Marc Fisher</u>     | Date <u>Jul. 18, 2019</u> |
| Name (6) <u>Debiao Li</u>       | Signature <u>Debiao Li</u>       | Date <u>Jul. 18, 2019</u> |
| Name (7) <u>Weihai Xu</u>       | Signature <u>Weihai Xu</u>       | Date <u>Jul. 18, 2019</u> |
| Name (8) <u>Tao Jiang</u>       | Signature <u>Tao Jiang</u>       | Date <u>Jul. 18, 2019</u> |
| Name (9) <u>Jingliang Cheng</u> | Signature <u>Jingliang Cheng</u> | Date <u>Jul. 18, 2019</u> |
| Name (10) <u>Bin Sun</u>        | Signature <u>Bin Sun</u>         | Date <u>Jul. 18, 2019</u> |
| Name (11) <u>Xunmin Ji</u>      | Signature <u>Xunmin Ji</u>       | Date <u>Jul. 18, 2019</u> |
| Name (12) <u>Qi Yang</u>        | Signature <u>Qi Yang</u>         | Date <u>July 18, 2019</u> |

Please scan and email to [stroke@strokeahajournal.org](mailto:stroke@strokeahajournal.org).
