# Supplementary material
Source: PubMed Central journal article supplement (PMC6817420)
Supplement: NIHMS1537877-supplement-Supplemental_Material.pdf [file NIHMS1537877-supplement-Supplemental_Material.pdf]

## Supplemental Material

**Table I. Colinear diagnosis**

| Colinear diagnosis    | Colinear statistics |       |
|-----------------------|---------------------|-------|
|                       | tolerance           | VIF   |
| Intramural hematoma   | 0.611               | 1.635 |
| Pseudoaneurysm        | 0.556               | 1.799 |
| Irregular Surface     | 0.577               | 1.734 |
| Intraluminal thrombus | 0.519               | 1.926 |
| Stenosis degree       | 0.635               | 1.574 |

**Abbreviations:** VIF, variance inflation factor
